# Supplementary material for: Longitudinal Dynamics of Clinical and Neurophysiological Changes in Parkinson's Disease: A 4.5-Year Cohort Study
Source: Research Square preprint supplement (doi:10.21203/rs.3.rs-6246415/v1), 2025-05-07
Supplement: Supplementary file 1 [file 6e386e34b6f9a9ec8423c1b1.docx]

**Supplementary Information**


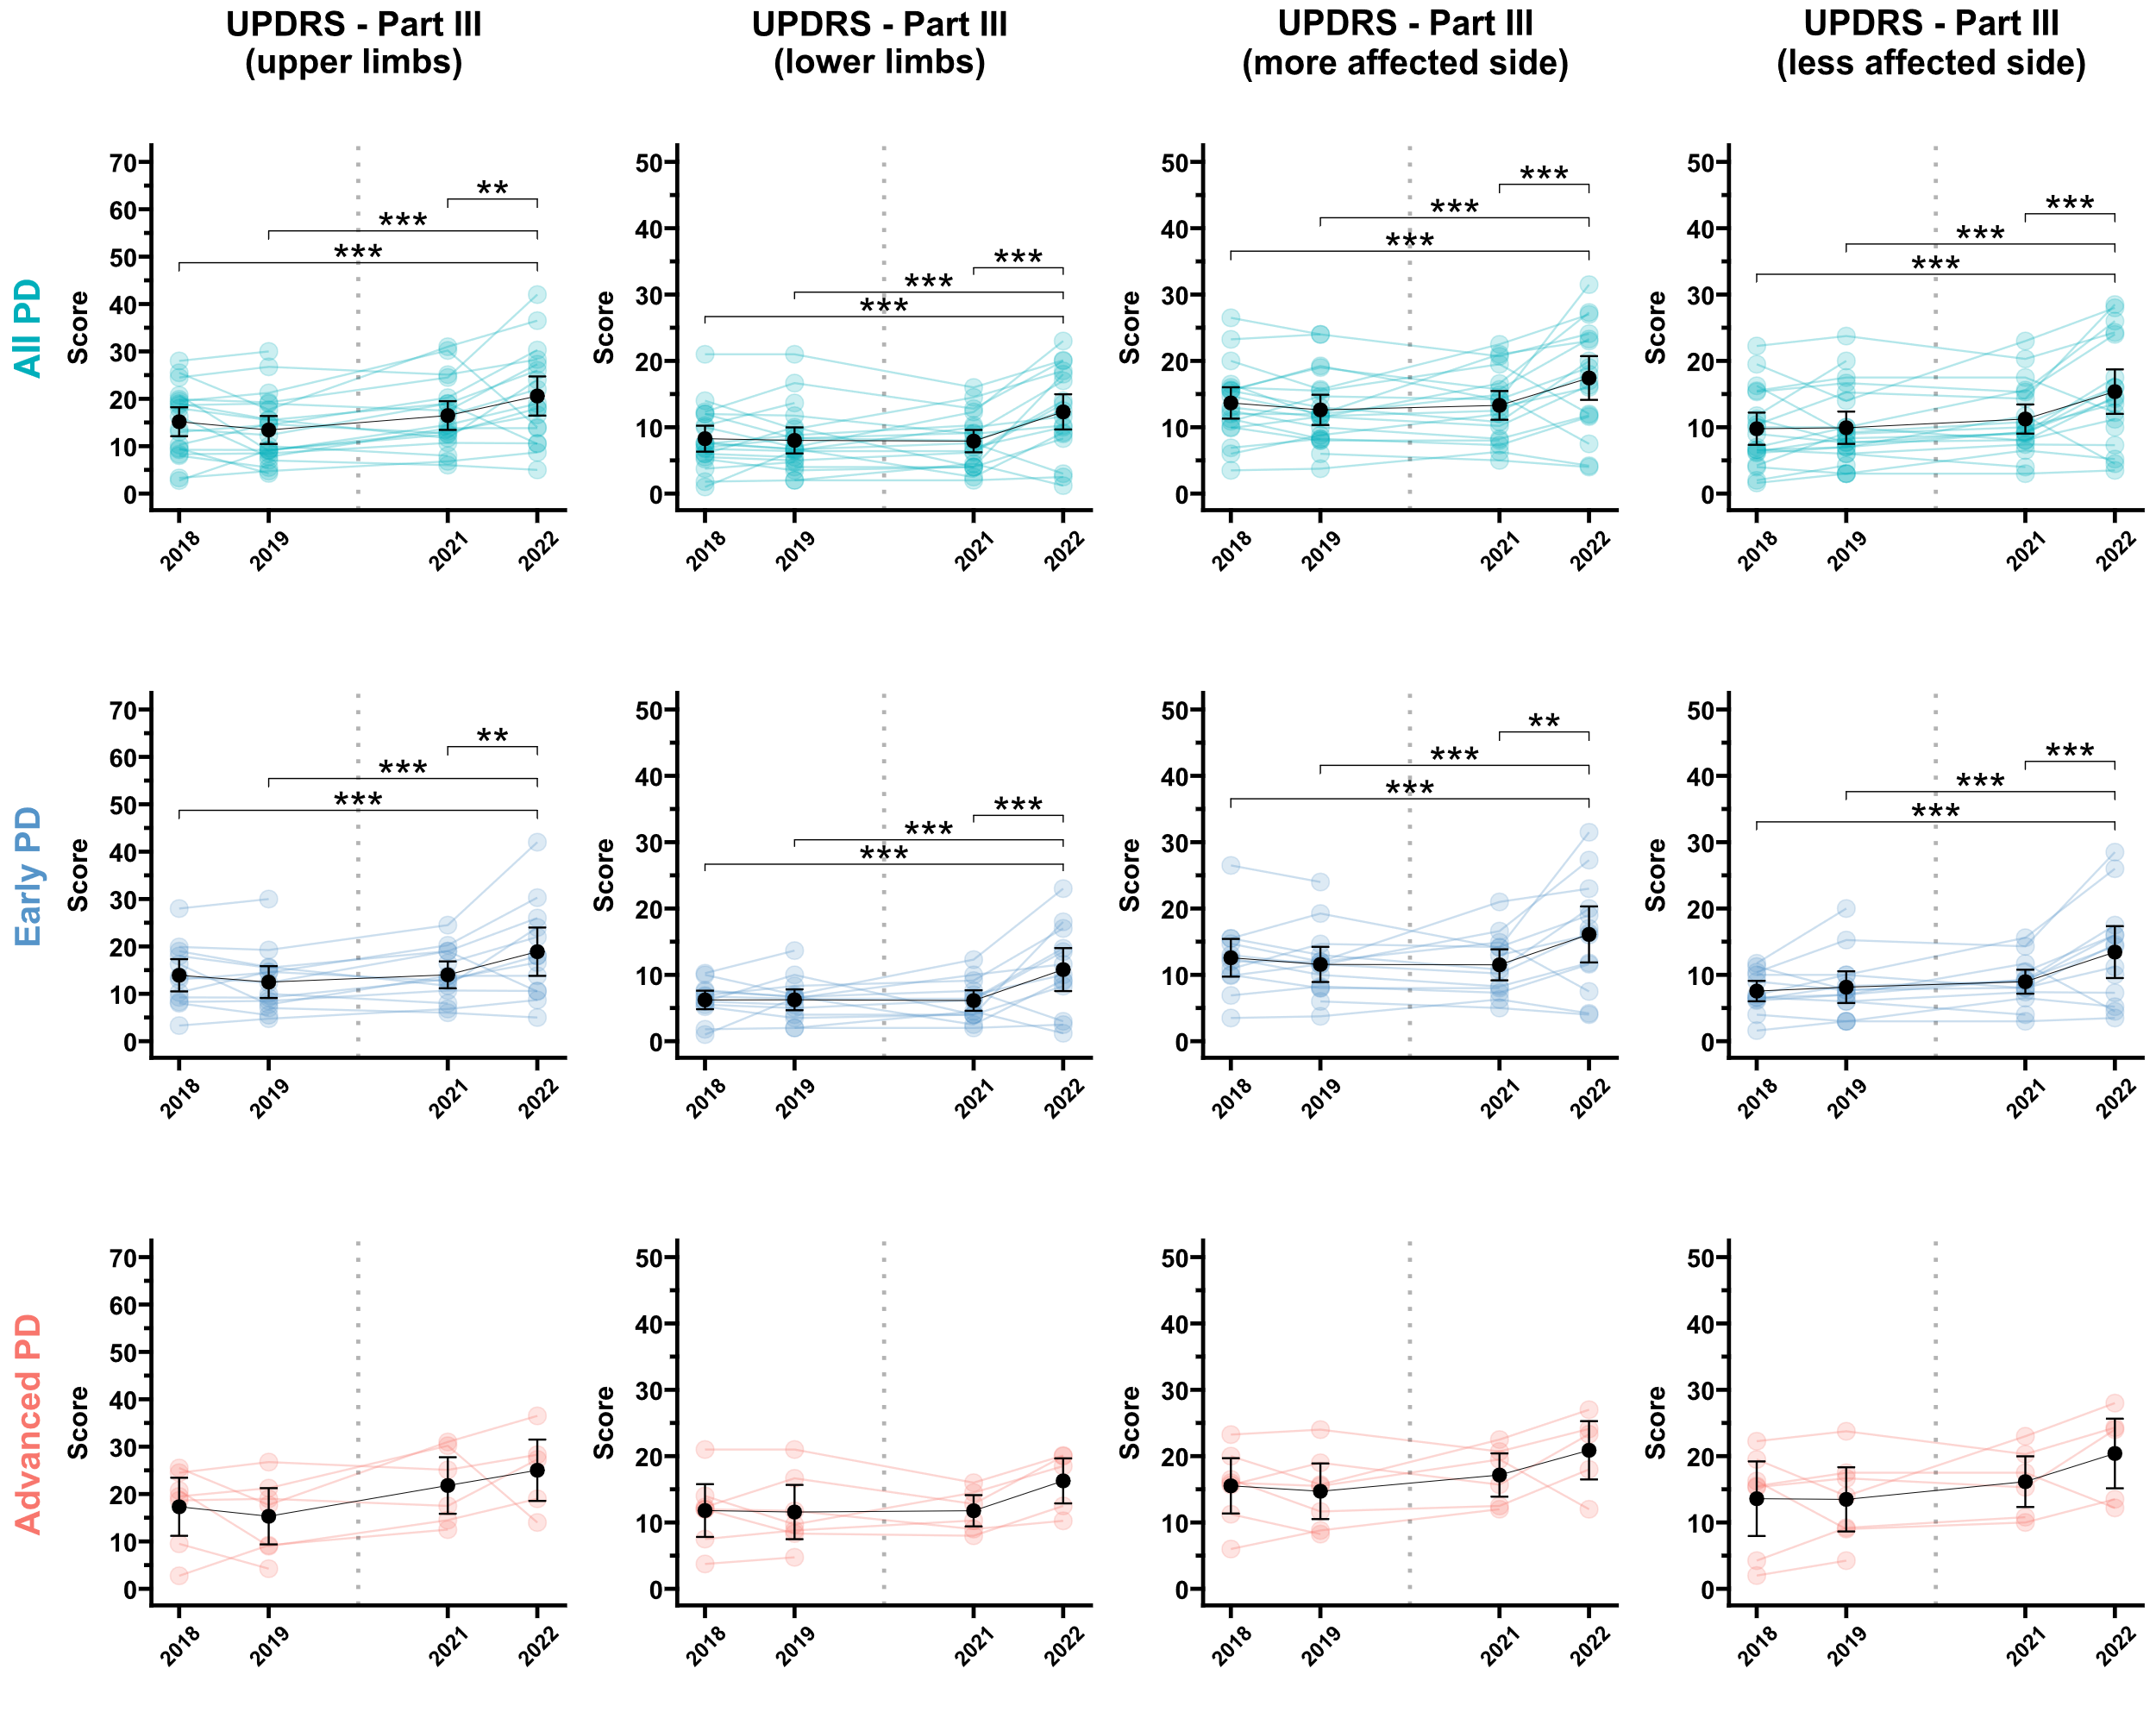


**Supplementary Figure 1.** Longitudinal changes in UPDRS Part III scores across evaluation periods, stratified by upper and lower limb assessments and the more affected and less affected sides. Data are shown for all Parkinson’s disease (PD) patients, as well as for early and advanced PD subgroups. Error bars indicate 95% confidence intervals, **p < 0.01, ***p < 0.001.


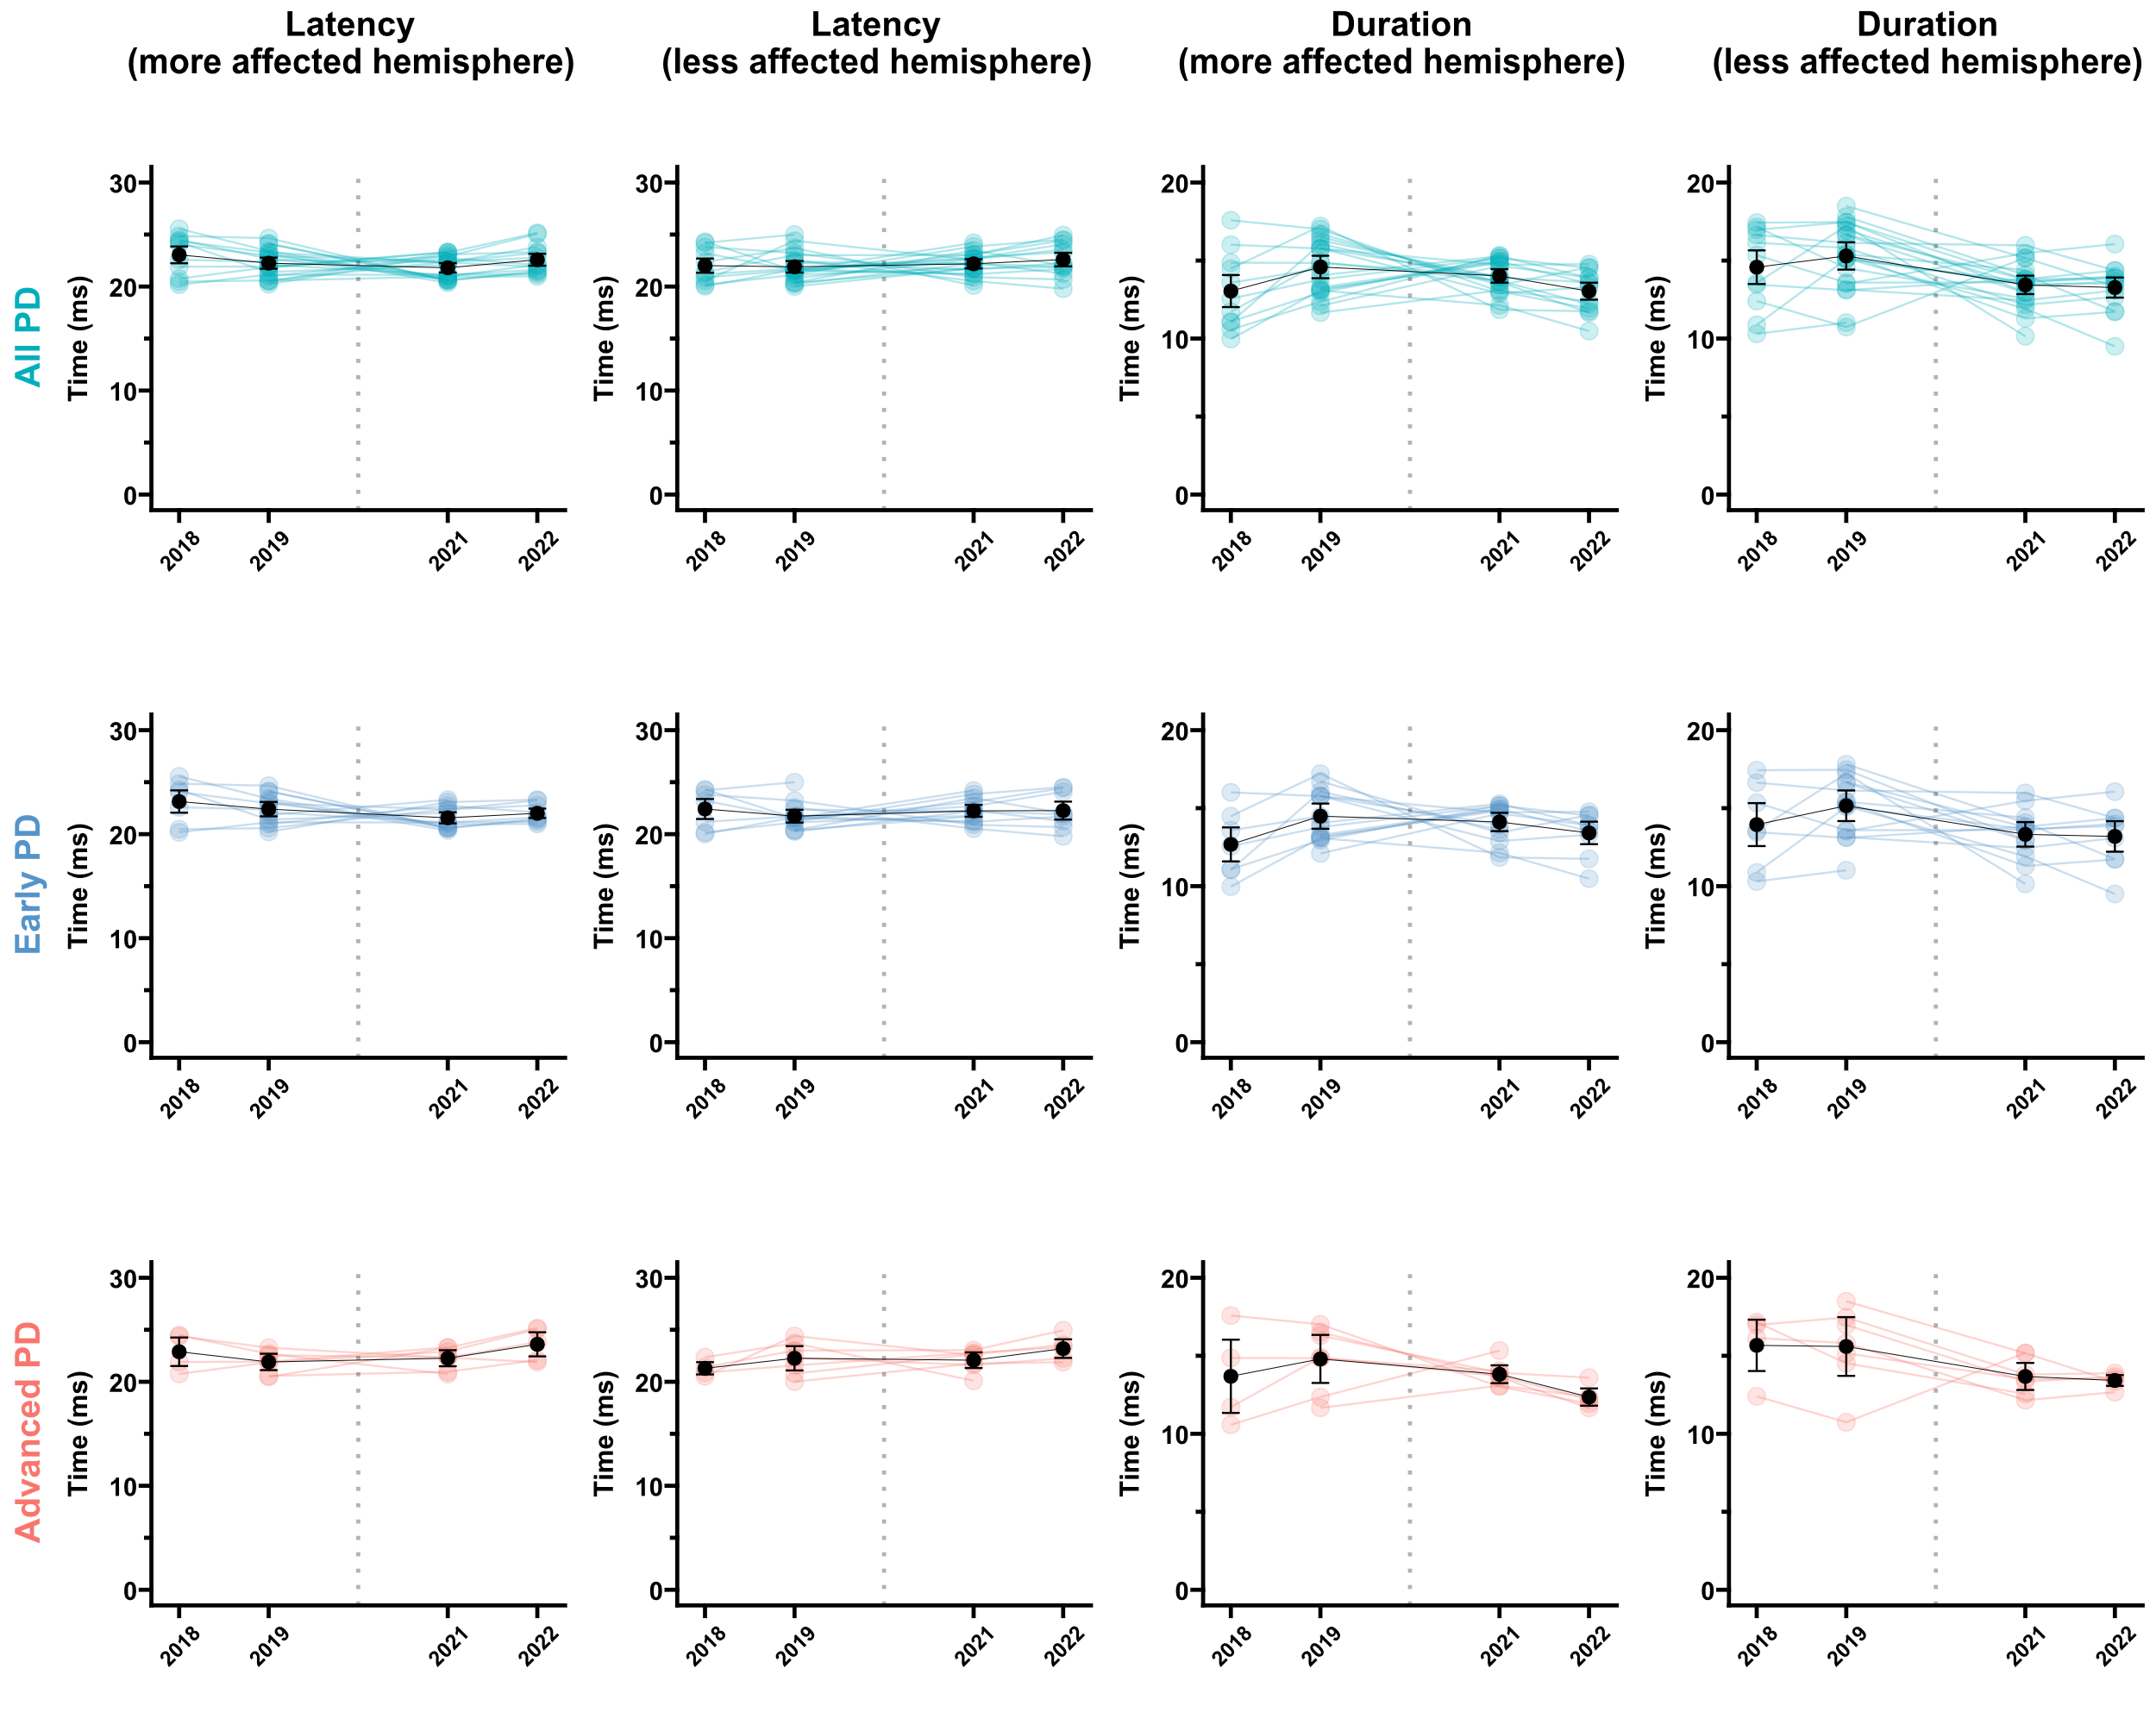


**Supplementary Figure 2.** Latency and duration of transcranial magnetic stimulation motor-evoked potentials across evaluation periods, stratified by all Parkinson’s disease (PD) patients, early PD, and advanced PD subgroups. Error bars indicate 95% confidence intervals.


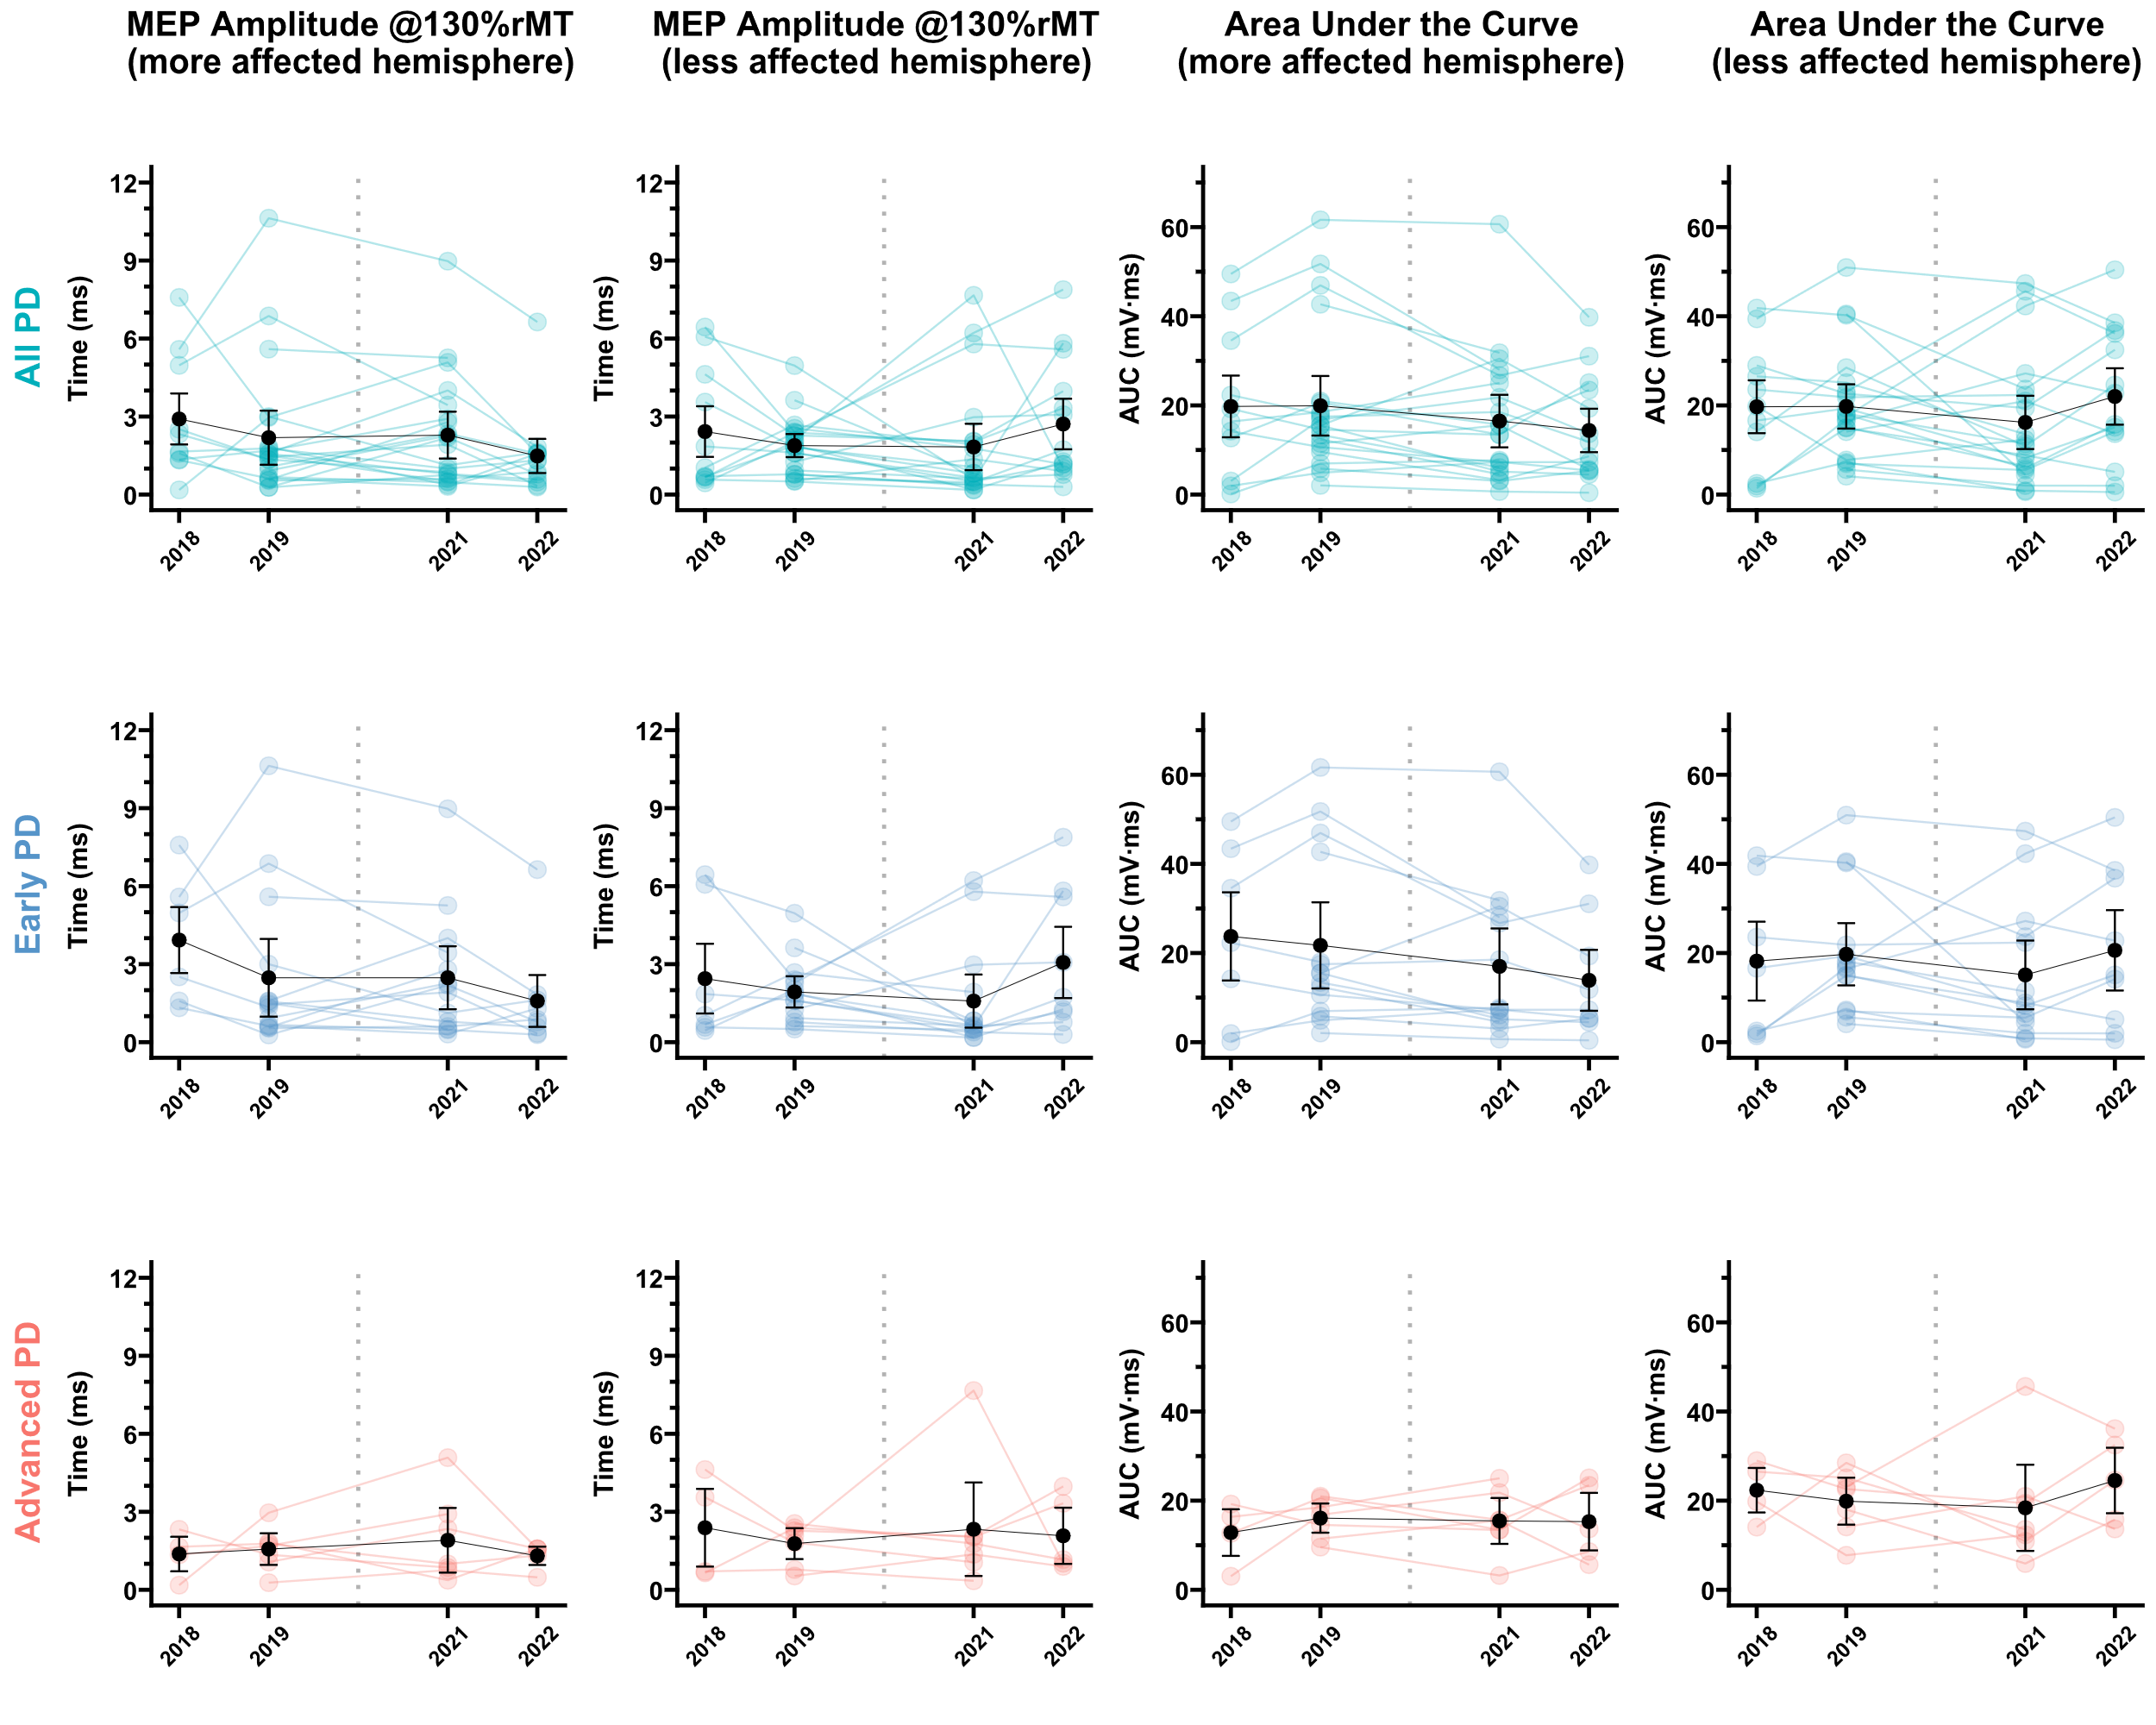


**Supplementary Figure 3.** The amplitude of transcranial magnetic stimulation motor-evoked potentials (MEPs) at S50 intensity (130% of resting motor threshold, rMT) and the area under the recruitment curve across evaluation periods, stratified by all Parkinson’s disease (PD) patients, early PD, and advanced PD subgroups. Error bars indicate 95% confidence intervals.


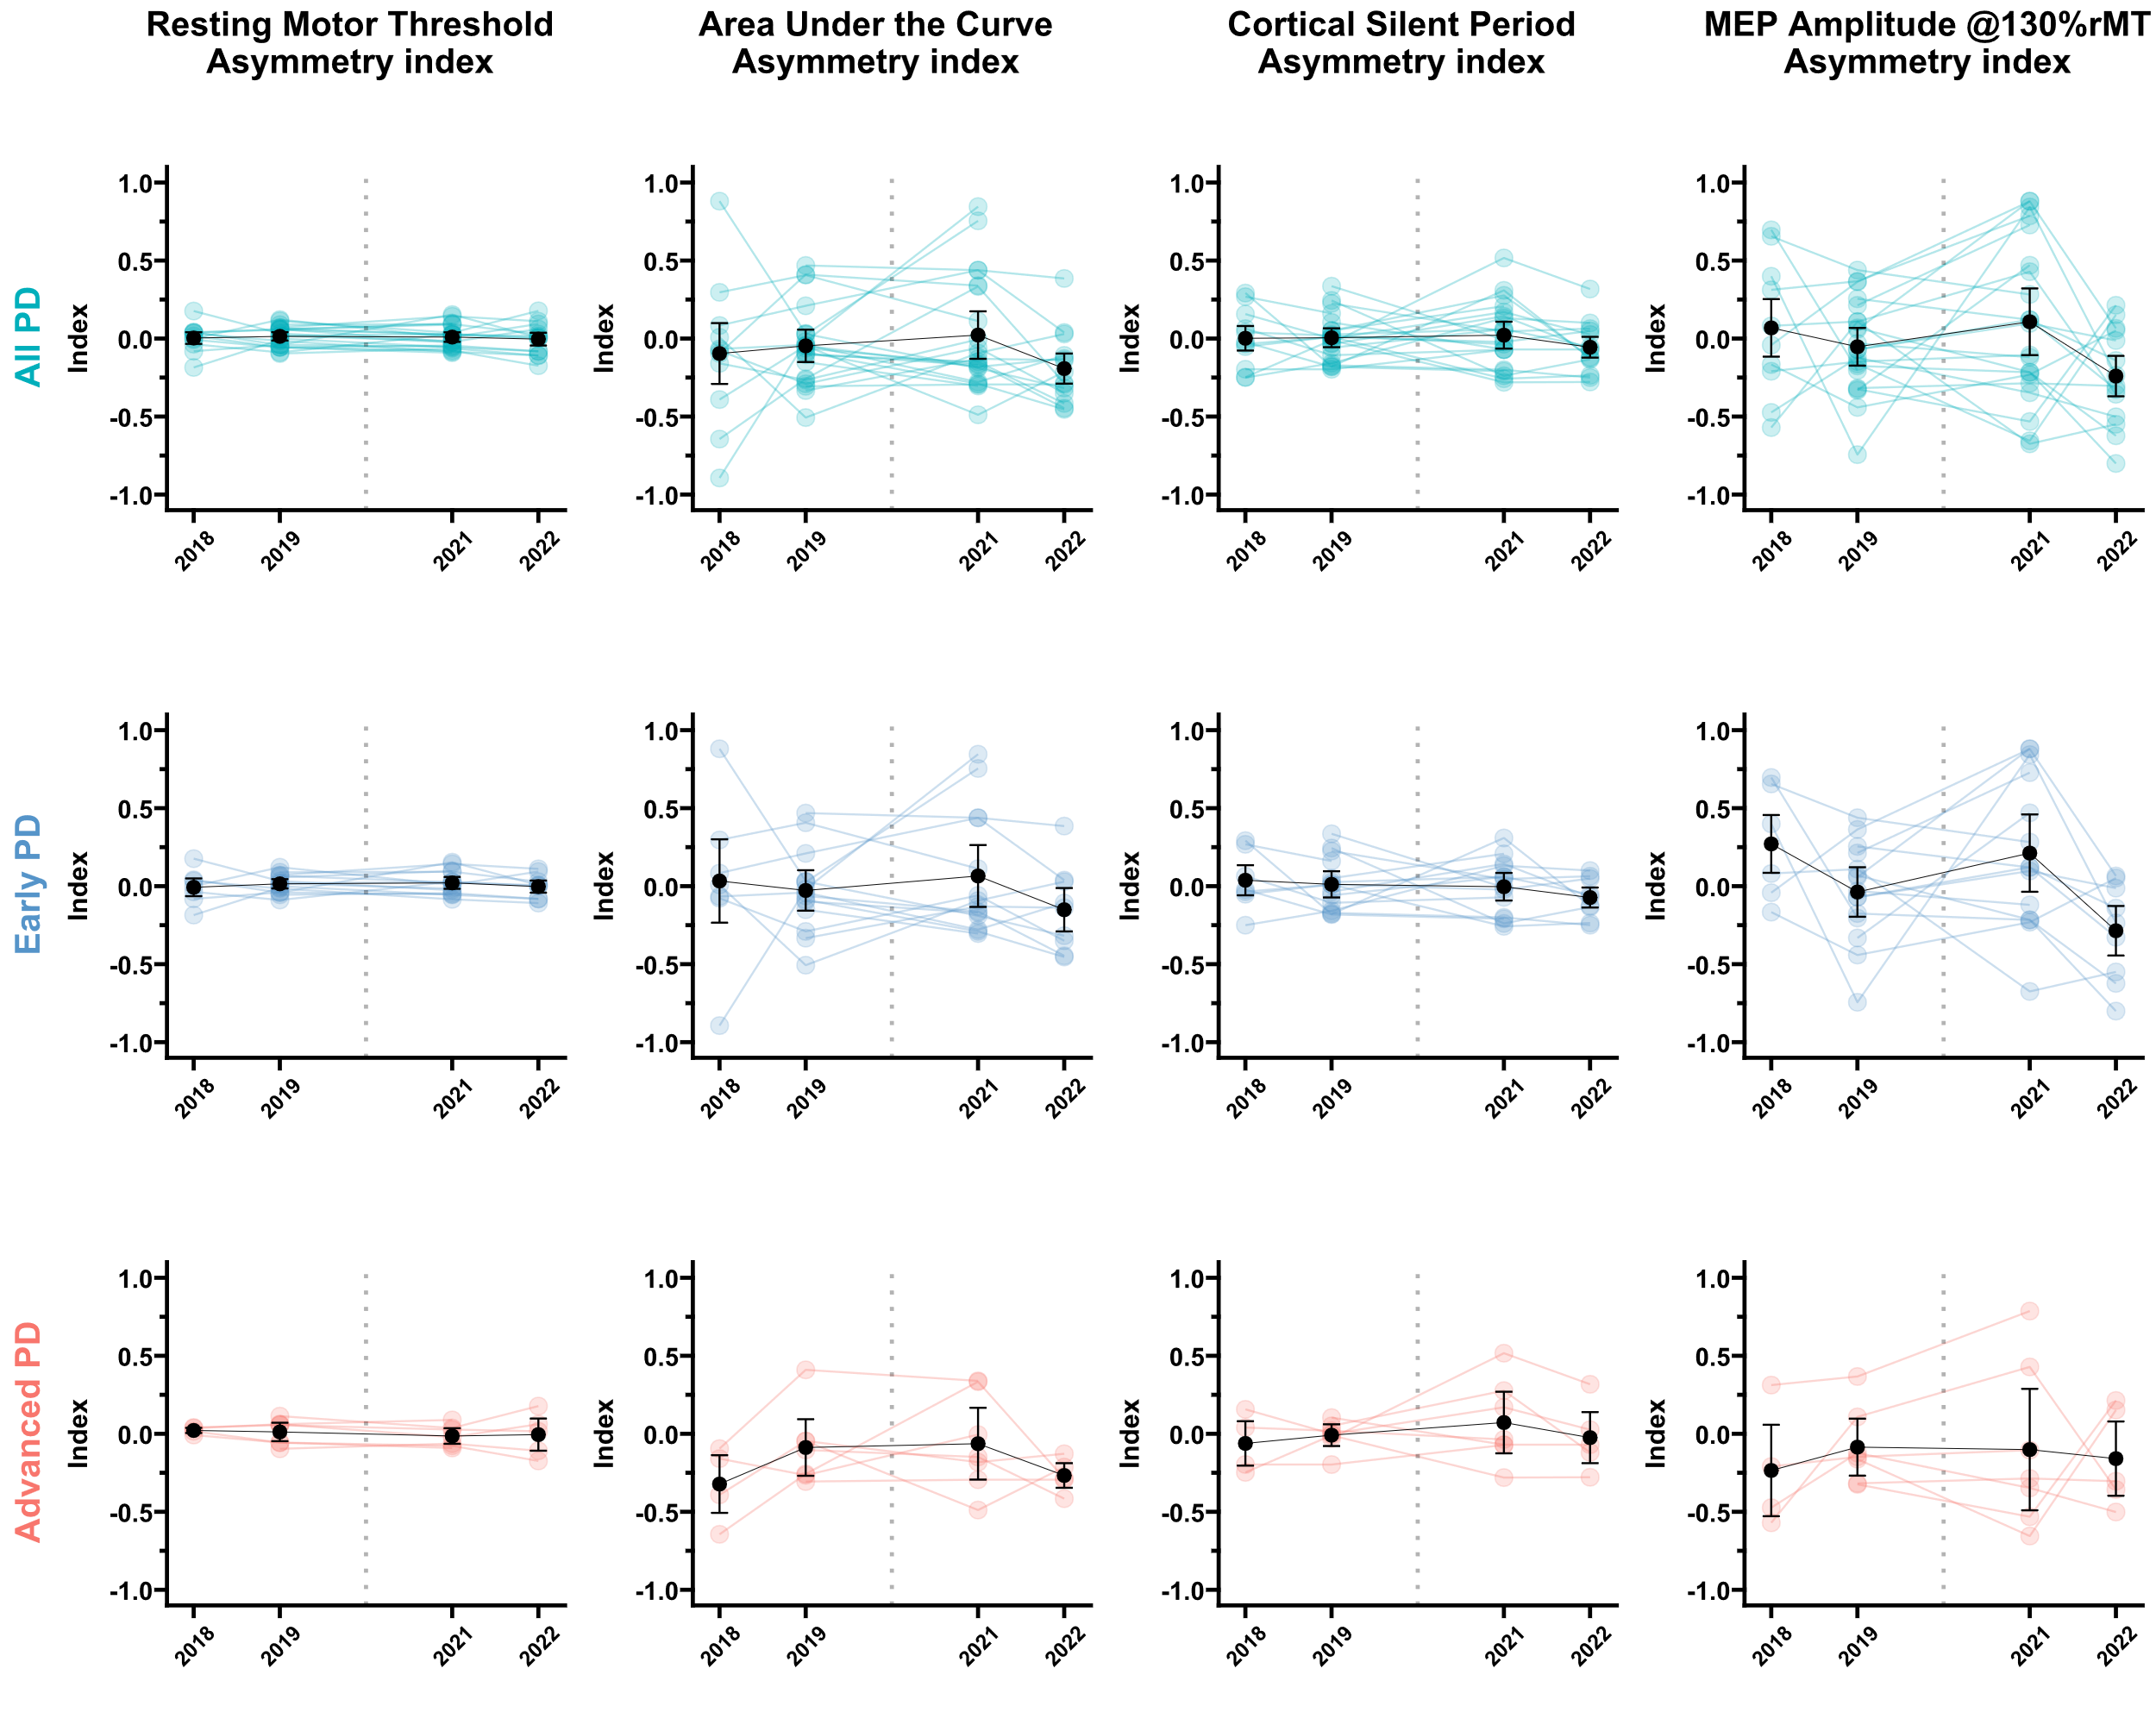


**Supplementary Figure 4.** Asymmetry indices for resting motor threshold (rMT), the area under the recruitment curve, cortical silent period, and motor-evoked potential (MEP) amplitude at S50 intensity across evaluation periods, stratified by all Parkinson’s disease (PD) patients, early PD, and advanced PD subgroups. Error bars indicate 95% confidence intervals.

**Supplementary Table 1.** Results from the analysis of the effect of time on clinical outcomes (UPDRS).

| Group | Clinical parameter | F | dfnum | dfden | p-value |  |
| --- | --- | --- | --- | --- | --- | --- |
| All PD | UPDRS-Part I | 7.55 | 3 | 51.41 | **<0.001** | 0.31 |
| UPDRS-Part II | 13.96 | 3 | 51.36 | **<0.001** | 0.45 |
| UPDRS-Part III | 15.24 | 3 | 52.54 | **<0.001** | 0.47 |
| UPDRS-Part III (UL) | 12.70 | 3 | 52.47 | **<0.001** | 0.42 |
| UPDRS-Part III (LL) | 11.20 | 3 | 53.19 | **<0.001** | 0.39 |
| UPDRS-Part III (MAS) | 9.68 | 3 | 52.41 | **<0.001** | 0.36 |
| UPDRS-Part III (LAS) | 14.74 | 3 | 52.81 | **<0.001** | 0.46 |
| UPDRS-Part III (AI) | 5.42 | 3 | 51.93 | **0.003** | 0.24 |
| Early PD | UPDRS-Part I | 3.23 | 3 | 32.89 | **0.035** | 0.23 |
| UPDRS-Part II | 11.23 | 3 | 33.05 | **<0.001** | 0.50 |
| UPDRS-Part III | 14.33 | 3 | 33.98 | **<0.001** | 0.56 |
| UPDRS-Part III (UL) | 11.07 | 3 | 34.05 | **<0.001** | 0.49 |
| UPDRS-Part III (LL) | 12.07 | 3 | 34.81 | **<0.001** | 0.51 |
| UPDRS-Part III (MAS) | 8.14 | 3 | 33.95 | **<0.001** | 0.42 |
| UPDRS-Part III (LAS) | 14.59 | 3 | 34.39 | **<0.001** | 0.56 |
| UPDRS-Part III (AI) | 6.46 | 3 | 35.75 | **0.001** | 0.35 |
| Advanced PD | UPDRS-Part I | 7.67 | 3 | 15.38 | **0.002** | 0.60 |
| UPDRS-Part II | 4.20 | 3 | 15.14 | **0.024** | 0.45 |
| UPDRS-Part III | 5.81 | 3 | 15.00 | **0.008** | 0.54 |
| UPDRS-Part III (UL) | 2.05 | 3 | 14.91 | 0.150 | 0.29 |
| UPDRS-Part III (LL) | 1.86 | 3 | 14.92 | 0.180 | 0.27 |
| UPDRS-Part III (MAS) | 1.97 | 3 | 15.02 | 0.162 | 0.28 |
| UPDRS-Part III (LAS) | 1.55 | 3 | 14.84 | 0.242 | 0.24 |
| UPDRS-Part III (AI) | 0.31 | 3 | 14.58 | 0.816 | 0.06 |

**Supplementary Table 2.** Results from the analysis of the effect of time on TMS outcomes.

| Group | TMS parameter | F | dfnum | dfden | p-value |  |
| --- | --- | --- | --- | --- | --- | --- |
| All PD | rMT (MAH) | 6.50 | 3 | 43.75 | **0.001** | 0.31 |
| rMT (LAH) | 6.82 | 3 | 43.89 | **0.001** | 0.32 |
| Latency (MAH) | 2.31 | 3 | 64.00 | 0.085 | 0.10 |
| Latency (LAH) | 0.94 | 3 | 64.00 | 0.429 | 0.04 |
| Duration (MAH) | 3.87 | 3 | 52.13 | **0.014** | 0.18 |
| Duration (LAH) | 5.48 | 3 | 45.20 | **0.003** | 0.27 |
| CSP (MAH) | 7.87 | 3 | 45.16 | **<0.001** | 0.34 |
| CSP (LAH) | 15.92 | 3 | 45.11 | **<0.001** | 0.51 |
| Amplitude (MAH) | 0.89 | 3 | 44.49 | 0.452 | 0.06 |
| Amplitude (LAH) | 1.17 | 3 | 47.09 | 0.330 | 0.07 |
| AURC (MAH) | 1.73 | 3 | 44.18 | 0.174 | 0.11 |
| AURC (LAH) | 1.55 | 3 | 47.08 | 0.213 | 0.09 |
| rMT (AI) | 0.60 | 3 | 45.05 | 0.618 | 0.04 |
| AURC (AI) | 1.77 | 3 | 44.36 | 0.167 | 0.11 |
| CSP (AI) | 0.81 | 3 | 46.71 | 0.496 | 0.05 |
| Amplitude (AI) | 2.00 | 3 | 46.72 | 0.128 | 0.11 |
| Early PD | rMT (MAH) | 4.26 | 3 | 27.54 | **0.014** | 0.32 |
| rMT (LAH) | 7.27 | 3 | 27.59 | **0.001** | 0.44 |
| Latency (MAH) | 2.89 | 3 | 41.00 | **0.047** | 0.17 |
| Latency (LAH) | 0.73 | 3 | 27.72 | 0.542 | 0.07 |
| Duration (MAH) | 2.33 | 3 | 33.69 | 0.092 | 0.17 |
| Duration (LAH) | 2.58 | 3 | 28.83 | 0.073 | 0.21 |
| CSP (MAH) | 3.98 | 3 | 28.51 | **0.017** | 0.30 |
| CSP (LAH) | 12.72 | 3 | 28.38 | **<0.001** | 0.57 |
| Amplitude (MAH) | 1.37 | 3 | 27.77 | 0.274 | 0.13 |
| Amplitude (LAH) | 1.31 | 3 | 29.47 | 0.289 | 0.12 |
| AURC (MAH) | 1.47 | 3 | 26.52 | 0.246 | 0.14 |
| AURC (LAH) | 1.00 | 3 | 31.02 | 0.407 | 0.09 |
| rMT (AI) | 0.40 | 3 | 28.97 | 0.757 | 0.04 |
| AURC (AI) | 0.98 | 3 | 29.02 | 0.414 | 0.09 |
| CSP (AI) | 0.71 | 3 | 30.18 | 0.556 | 0.07 |
| Amplitude (AI) | 3.44 | 3 | 30.92 | **0.029** | 0.25 |
| Advanced PD | rMT (MAH) | 4.62 | 3 | 13.17 | **0.020** | 0.51 |
| rMT (LAH) | 2.40 | 3 | 13.18 | 0.114 | 0.35 |
| Latency (MAH) | 1.32 | 3 | 19.00 | 0.298 | 0.17 |
| Latency (LAH) | 1.50 | 3 | 13.79 | 0.259 | 0.25 |
| Duration (MAH) | 2.63 | 3 | 14.74 | 0.089 | 0.35 |
| Duration (LAH) | 5.45 | 3 | 13.37 | **0.011** | 0.55 |
| CSP (MAH) | 3.82 | 3 | 13.50 | **0.036** | 0.46 |
| CSP (LAH) | 2.46 | 3 | 13.94 | 0.106 | 0.35 |
| Amplitude (MAH) | 0.10 | 3 | 14.71 | 0.958 | 0.02 |
| Amplitude (LAH) | 0.24 | 3 | 14.13 | 0.865 | 0.05 |
| AURC (MAH) | 0.07 | 3 | 18.00 | 0.974 | 0.01 |
| AURC (LAH) | 1.23 | 3 | 14.03 | 0.336 | 0.21 |
| rMT (AI) | 0.87 | 3 | 13.31 | 0.482 | 0.16 |
| AURC (AI) | 1.21 | 3 | 12.81 | 0.346 | 0.22 |
| CSP (AI) | 0.52 | 3 | 13.47 | 0.678 | 0.10 |
| Amplitude (AI) | 0.14 | 3 | 13.18 | 0.931 | 0.03 |

**Supplementary Table 3.** Within-subjects correlations by group.

| **All PD** | | | | |
| --- | --- | --- | --- | --- |
| **TMS parameter** | **Clinical parameter** | **Correlation coefficient and 95%CI** | **p-value** | **adjusted p-value1** |
| CSP-LAH | UPDRS-Part III (UL) | 0.3155 [0.0167, 0.5625] | 0.0393 | 0.9414 |
| **Early PD** | | | | |
| **TMS parameter** | **Clinical parameter** | **Correlation coefficient and 95%CI** | **p-value** | **adjusted p-value1** |
| CSP-LAH | UPDRS-Part III | 0.4074 [0.0481, 0.6734] | 0.0282 | 0.3273 |
| CSP-LAH | UPDRS-Part III (UL) | 0.4354 [0.0820, 0.6915] | 0.0182 | 0.3273 |
| CSP-LAH | UPDRS-Part III (LL) | 0.4095 [0.0506, 0.6747] | 0.0274 | 0.3273 |
| CSP-LAH | UPDRS-Part III (MAS) | 0.4027 [0.0425, 0.6703] | 0.0303 | 0.3273 |
| CSP-LAH | UPDRS-Part III (LAS) | 0.4058 [0.0462, 0.6723] | 0.0289 | 0.3273 |
| 1Values adjusted by false discovery rate | | | | |

**Supplementary Table 4.** Between-subjects correlations by group.

| **All PD** | | | | |
| --- | --- | --- | --- | --- |
| **TMS parameter** | **Clinical parameter** | **Correlation coefficient and 95%CI** | **p-value** | **adjusted p-value1** |
| AURC-AI | UPDRS-Part III (LAS) | -0.4485 [-0.6254, -0.2278] | 0.0363 | 0.9320 |
| AURC-AI | AI | 0.6851 [0.5283, 0.7968] | 0.0004 | 0.0234 |
| **Early PD** | | | | |
| **TMS parameter** | **Clinical parameter** | **Correlation coefficient and 95%CI** | **p-value** | **adjusted p-value1** |
| AURC-AI | AI | 0.6347 [0.4131, 0.7853] | 0.0110 | 0.5954 |
| **Advanced PD** | | | | |
| **TMS parameter** | **Clinical parameter** | **Correlation coefficient and 95%CI** | **p-value** | **adjusted p-value1** |
| AURC-AI | AI | 0.9561 [0.8930, 0.9823] | 0.0008 | 0.0409 |
| 1Values adjusted by false discovery rate | | | | |
